# Supplementary material for: Ecological and Epidemiological Findings Associated with Zoonotic Rabies Outbreaks and Control in Moshi, Tanzania, 2017–2018
Source: PubMed Central journal article supplement (PMC6719226; doi:10.3390/ijerph16162816), 2019-08-07
Supplement: ijerph-16-02816-s001.pdf [file ijerph-16-02816-s001.pdf]

## RABIES HOUSEHOLD QUESTIONNAIRE

Name of Enumerator.....

Date.....District...Moshi.....Village.....

.....

Vaccination centre.....

### A: DEMOGRAPHY

GPS coordinates Lat: ..... Long: ..... Elevation (m) .....

#### 1. Household data

|      |                                     |                                                                                                                   |     |                                          |                        |
|------|-------------------------------------|-------------------------------------------------------------------------------------------------------------------|-----|------------------------------------------|------------------------|
| i.   | Name of the Respondent              |                                                                                                                   | ii. | Age<br>Gender ( <i>tick</i> √)           | Yrs.....<br>M....F.... |
| iii. | Head of the household               | Age (yrs.) .....<br>Gender ( <i>tick</i> √) M....F....                                                            | iv. | Number of people living in the household | M.....<br>F.....       |
| v.   | Level of Education ( <i>tick</i> √) | No formal education<br>Completed Primary school<br>Completed Secondary school<br>Tertiary<br>Other (specify)..... |     |                                          |                        |

### B: HERD DYNAMICS

#### 2. Herd size: how many animals of different species and ages are in the herd?

| Species                            | Young<br>( $<6$ months for dogs, $<1$ year for pigs, goats, sheep and $<2$ years cattle and camels) |        | Mature<br>( $\geq 6$ months for dogs, $\geq 1$ year for pigs, goats, sheep and $\geq 2$ years cattle and camels) |        | Total |
|------------------------------------|-----------------------------------------------------------------------------------------------------|--------|------------------------------------------------------------------------------------------------------------------|--------|-------|
|                                    | Male                                                                                                | Female | Male                                                                                                             | Female |       |
|                                    | i. Dogs                                                                                             |        |                                                                                                                  |        |       |
| ii. Cats                           |                                                                                                     |        |                                                                                                                  |        |       |
| iii. Pigs                          |                                                                                                     |        |                                                                                                                  |        |       |
| iv. Goats                          |                                                                                                     |        |                                                                                                                  |        |       |
| v. Sheep                           |                                                                                                     |        |                                                                                                                  |        |       |
| vi. Cattle                         |                                                                                                     |        |                                                                                                                  |        |       |
| vii. Other (specify).....<br>..... |                                                                                                     |        |                                                                                                                  |        |       |

#### 3. In the past year, how many animals were added to the herd and reasons for addition?

| Species   | No. born | No. bought | No. gifts received or borrowed | Other reasons for additions |
|-----------|----------|------------|--------------------------------|-----------------------------|
| i. Dogs   |          |            |                                |                             |
| ii. Cats  |          |            |                                |                             |
| iii. Pigs |          |            |                                |                             |
| iv. Goats |          |            |                                |                             |

## RABIES HOUSEHOLD QUESTIONNAIRE

Name of Enumerator.....

Date.....District...Moshi.....Village.....

.....

Vaccination centre.....

|                         |  |  |  |  |
|-------------------------|--|--|--|--|
| v. Sheep                |  |  |  |  |
| vi. Cattle              |  |  |  |  |
| vii. Other (specify)... |  |  |  |  |
| .....                   |  |  |  |  |

4. In the past year, how many animals have left the herd and reasons for leaving?

| Species                   | No. died | No. sold | No. slaughtered | No. gifted or loaned | No. Stolen | No left due to Predation | Other (specify) |
|---------------------------|----------|----------|-----------------|----------------------|------------|--------------------------|-----------------|
| i. Dogs                   |          |          |                 |                      |            |                          |                 |
| ii. Cats                  |          |          |                 |                      |            |                          |                 |
| iii. Pigs                 |          |          |                 |                      |            |                          |                 |
| iv. Goats                 |          |          |                 |                      |            |                          |                 |
| v. Sheep                  |          |          |                 |                      |            |                          |                 |
| vi. Cattle                |          |          |                 |                      |            |                          |                 |
| vii. Other (specify)..... |          |          |                 |                      |            |                          |                 |

5. What were the reasons for death(s), if any in the herd (*tick*)?

- i. Old age
- ii. Still birth
- iii. Predation
- iv. Drought
- v. Disease (specify).....
- vi. Unknown
- vii. Other (specify).....

6. What is the main reason for keeping each species?

| Species | Dairy | Meat | Drought power | Security | Other (specify) |
|---------|-------|------|---------------|----------|-----------------|
| Cats    |       |      |               |          |                 |
| Dogs    |       |      |               |          |                 |
| Pigs    |       |      |               |          |                 |

## RABIES HOUSEHOLD QUESTIONNAIRE

Name of Enumerator.....

Date.....District...Moshi.....Village.....

.....

Vaccination centre.....

|                      |  |  |  |  |  |
|----------------------|--|--|--|--|--|
| Goats                |  |  |  |  |  |
| Sheep                |  |  |  |  |  |
| Cattle               |  |  |  |  |  |
| Other (specify)..... |  |  |  |  |  |

7. What is the main farming system? *(tick✓)*

- i. Sedentary mixed farming
- ii. Agro-pastoralist
- iii. Pastoralist

8. Housing: are the livestock enclosed? *(tick✓)*

Yes ( ) No ( )

9. If Yes, how are they kept? *(tick✓)*

- i. Enclosed at night
- ii. Enclosed during day
- iii. Enclosed during day and night

10. Do you provide shelter for your dog? *(tick✓)*

Yes ( ) No ( )

### C: CONTACTS WITH WILDLIFE

11. Over the past 12 months have you seen wild animals near your village? *(tick✓)*

Yes ( ) No ( )

12. If Yes, what type of wild animals did you observe?

- i. Wild dogs (mbwa mwitu)
- ii. Hyena (fisi)
- iii. Fox (mbweha)

-----  
-----  
-----  
-----

13. Interaction with wildlife: do your animals often mix with wildlife? *(tick✓)* Yes ( ) No ( )

14. If Yes, where do they commonly interact? *(tick✓)*

| Species | During grazing | At watering point | During scavenging | Other activity |
|---------|----------------|-------------------|-------------------|----------------|
| Cats    |                |                   |                   |                |

## RABIES HOUSEHOLD QUESTIONNAIRE

Name of Enumerator.....

Date.....District...Moshi.....Village.....

.....

Vaccination centre.....

|                    |  |  |  |  |
|--------------------|--|--|--|--|
| Dogs               |  |  |  |  |
| Pigs               |  |  |  |  |
| Goats              |  |  |  |  |
| Sheep              |  |  |  |  |
| Cattle             |  |  |  |  |
| Other<br>(specify) |  |  |  |  |

15. Presence of wildlife ecosystem in the village: which wildlife ecosystem present nearby the village?

| Wildlife ecosystem   | Name | Approximate distance from village |
|----------------------|------|-----------------------------------|
| National Park        |      |                                   |
| Forest Reserve       |      |                                   |
| Game Reserve         |      |                                   |
| Game-controlled Area |      |                                   |
| Other                |      |                                   |

### D: KNOWLEDGE OF ANIMAL DISEASES

16. What are the diseases that you commonly experience and name animal type affected?

- i.....
- ii.....
- iii.....
- iv.....
- v.....

17. Are there any animals in the herd that are currently sick? (tick✓) Yes/No

18. Describe the clinical signs of the disease if they currently have any sick animals

| Animal type affected | Suspected disease | Local disease name | Number affected | Main clinical signs ( <i>loss of appetite, weight loss, swollen lymph nodes, red urine, changed behaviour .....</i> ) | Occurred last year (Yes/No) |
|----------------------|-------------------|--------------------|-----------------|-----------------------------------------------------------------------------------------------------------------------|-----------------------------|
|                      |                   |                    |                 |                                                                                                                       |                             |
|                      |                   |                    |                 |                                                                                                                       |                             |

## RABIES HOUSEHOLD QUESTIONNAIRE

Name of Enumerator.....

Date.....District...Moshi.....Village.....

.....

Vaccination centre.....

|  |  |  |  |  |
|--|--|--|--|--|
|  |  |  |  |  |
|  |  |  |  |  |
|  |  |  |  |  |

19. When was the last time you vaccinated your animals?

| Type of animal vaccinated    | Disease | When vaccinated |
|------------------------------|---------|-----------------|
| i. Dogs                      |         |                 |
| ii. Cats                     |         |                 |
| iii. Pigs                    |         |                 |
| iv. Goats                    |         |                 |
| v. Sheep                     |         |                 |
| vi. Cattle                   |         |                 |
| vii. Other<br>(specify)..... |         |                 |

### E: GENERAL KNOWLEDGE ON RABIES

20. Are you aware of diseases called Rabies? (tick✓) Yes ( ) No ( )

21. Does rabies affect animals? (tick✓) Yes ( ) No ( )

22. What animals do the diseases affect? (tick✓)

Dogs ( ) cats ( ) sheep ( ) goats ( ) cattle ( ) others (specify).....

23. Has any of your animals affected by rabies? (tick✓) Yes ( ) No ( )

24. Does the disease affect human too? (tick✓) Yes ( ) No ( )

25. Has any member of your family affected by rabies? (tick✓) Yes ( ) No ( )

26. Mention any 3 signs of Rabies in animals and humans

|      | human | animals |
|------|-------|---------|
| i.   |       |         |
| ii.  |       |         |
| iii. |       |         |

27. Do you know how rabies is transmitted to animals or humans? (tick✓) Yes ( ) No ( )

28. In the last 12 months has anyone in your family been bitten by a dog? (tick✓) Yes ( ) No ( )

29. If Yes, what did you do about the bite? (tick✓)

i. Nothing ( )

ii. Washed/bandage ( )

## RABIES HOUSEHOLD QUESTIONNAIRE

Name of Enumerator.....

Date.....District...Moshi.....Village.....

.....

Vaccination centre.....

- iii. Used herb ( )
  - iv. Other .....
30. Were you given any injections? (*tick*✓) Yes ( ) No ( )
31. What type of injection?
- i. tetanus
  - ii. rabies
  - iii. I don't know
32. Did the affected person recover (*tick*✓) Yes ( ) No ( )
33. If No, did the person succumb to rabies (*tick*✓) Yes ( ) No ( )
34. Is there any animal in your house that was affected? (*tick*✓) Yes ( ) No ( )
35. Do you know of any other person in your communities bitten by a dog in the last 12 months (*tick*✓)  
Yes ( ) No ( )
36. If Yes, what did they do about the bite? (*tick*✓)
- v. Nothing ( )
  - vi. Washed/bandage ( )
  - vii. Used herb ( )
  - viii. Other .....
37. Was the victim given any injections? (*tick*✓) Yes ( ) No ( )
38. What type of injection?
- iv. tetanus
  - v. rabies
  - vi. I don't know
39. Did the affected person recover (*tick*✓) Yes ( ) No ( )
40. If No, did the person succumb to rabies (*tick*✓) Yes ( ) No ( )

### F: TRACEABILITY, OTHER SOURCES OF INFORMATION

Key Informants/Local Leaders/

- 1. Any report of the similar incident within the locality? (*tick*✓) Yes ( ) No ( )
- 2. If yes where.....

### OBSERVATION

Presence of dogs not housed, roaming in the village

Scavenging practices
